# Supplementary material
Source: PubMed Central journal article supplement (PMC6097243)
Supplement: NIHMS979431-supplement-Supplemental_Data_File__doc__pdf__etc___1.pdf [file NIHMS979431-supplement-Supplemental_Data_File__doc__pdf__etc___1.pdf]

# Germline Variants and Risk for Pancreatic Cancer

## A Systematic Review and Emerging Concepts

### SUPPLEMENTAL DIGITAL CONTENT

**SUPPLEMENTARY TABLE 1.** List of All Studies With Germline Variant(s) Included

| PubMed ID | Year | Title                                                                                                                                                                                                                               | First Author | Country       | Population, Region              | Genes                       | Included Variant(s) | Bin1 | Bin2 |
|-----------|------|-------------------------------------------------------------------------------------------------------------------------------------------------------------------------------------------------------------------------------------|--------------|---------------|---------------------------------|-----------------------------|---------------------|------|------|
| 7522998   | 1994 | Association of pancreatic adenocarcinoma, mild lung disease, and delta F508 mutation in a cystic fibrosis patient.                                                                                                                  | Tsongalis GJ | United States | White, United States            | <i>CFTR</i>                 | 1                   | 0    | 1    |
| 8644702   | 1996 | Founding BRCA1 mutations in hereditary breast and ovarian cancer in southern Sweden.                                                                                                                                                | Johannsson O | Sweden        | Swedish, Sweden                 | <i>BRCA1</i>                | 1                   | 0    | 0    |
| 8673089   | 1996 | A single BRCA2 mutation in male and female breast cancer families from Iceland with varied cancer phenotypes                                                                                                                        | Thorlacius S | Iceland       | Icelanders, Iceland             | <i>BRCA2</i>                | 1                   | 0    | 1    |
| 8968085   | 1996 | Germline BRCA2 gene mutations in patients with apparently sporadic pancreatic carcinomas.                                                                                                                                           | Goggins M    | United States | Mixed, United States            | <i>BRCA2</i>                | 3                   | 1    | 0    |
| 9140390   | 1997 | Germline BRCA2 6174delT mutations in Ashkenazi Jewish pancreatic cancer patients.                                                                                                                                                   | Ozçelik H    | Canada        | Ashkenazi Jewish, Canada        | <i>BRCA2</i>                | 1                   | 1    | 0    |
| 9150150   | 1997 | BRCA2 in American families with four or more cases of breast or ovarian cancer: recurrent and novel mutations, variable expression, penetrance, and the possibility of families whose cancer is not attributable to BRCA1 or BRCA2. | Schubert EL  | United States | Ashkenazi Jewish, United States | <i>BRCA2</i>                | 1                   | 1    | 0    |
| 9150155   | 1997 | Study of a single BRCA2 mutation with high carrier frequency in a small population                                                                                                                                                  | Thorlacius S | Iceland       | Icelanders, Iceland             | <i>BRCA2</i>                | 1                   | 0    | 1    |
| 9973276   | 1999 | Inherited colorectal polyposis and cancer risk of the APC I1307K polymorphism.                                                                                                                                                      | Gryfe R      | Canada        | Ashkenazi Jewish, Canada        | <i>APC</i>                  | 1                   | 0    | 1    |
| 10362809  | 1999 | Germline and somatic mutations of the STK11/LKB1 Peutz-Jeghers gene in pancreatic and biliary cancers.                                                                                                                              | Su GH        | United States | Dutch, Netherland               | <i>STK11</i>                | 1                   | 0    | 0    |
| 10667595  | 2000 | Inherited predisposition to pancreatic adenocarcinoma: role of family history and germ-line p16, BRCA1, and BRCA2 mutations.                                                                                                        | Lal G        | Canada        | Mixed, Canada                   | <i>BRCA1, BRCA2, CDKN2A</i> | 5                   | 2    | 1    |
| 10719365  | 2000 | Patients with both pancreatic adenocarcinoma and melanoma may harbor germline CDKN2A mutations.                                                                                                                                     | Lal G        | Canada        | Unknown, Canada                 | <i>CDKN2A</i>               | 2                   | 0    | 2    |
| 10956390  | 2000 | Risk of developing pancreatic cancer in families with familial atypical multiple mole melanoma associated with a specific 19 deletion of p16 (p16-Leiden).                                                                          | Vasen HF     | Netherlands   | Dutch, Netherland               | <i>CDKN2A</i>               | 1                   | 1    | 0    |
| 11058911  | 2000 | A novel germline mutation, P48T, in the CDKN2A/p16 gene in a patient with pancreatic carcinoma.                                                                                                                                     | Moore PS     | Italy         | Italian, Italy                  | <i>CDKN2A</i>               | 1                   | 0    | 0    |
| 11115825  | 2001 | Cystic fibrosis transmembrane regulator (CFTR) DeltaF508 mutation and 5T allele in patients with chronic pancreatitis and exocrine pancreatic cancer. PANKRAS II Study Group.                                                       | Malats N     | Spain         | Unknown, Spain                  | <i>CFTR</i>                 | 1                   | 0    | 1    |
| 11207041  | 2001 | The rate of the 6174delT founder Jewish mutation in BRCA2 in patients with non-colonic gastrointestinal tract tumours in Israel.                                                                                                    | Figer A      | Israel        | Ashkenazi Jewish, Israel        | <i>BRCA2</i>                | 1                   | 1    | 0    |
| 11267991  | 2001 | A BRCA2 germ-line mutation in familial pancreatic carcinoma.                                                                                                                                                                        | White K      | Germany       | German, Germany                 | <i>BRCA2</i>                | 1                   | 1    | 0    |
| 11950811  | 2002 | Family history of cancer and germline BRCA2 mutations in sporadic exocrine pancreatic cancer.                                                                                                                                       | Real FX      | Spain         | Unknown, Spain                  | <i>BRCA2</i>                | 1                   | 0    | 0    |

(Continued on next page)

**SUPPLEMENTARY TABLE 1.** (Continued)

| PubMed ID | Year | Title                                                                                                                                                 | First Author       | Country       | Population, Region          | Genes               | Included Variant(s) | Bin1 | Bin2 |
|-----------|------|-------------------------------------------------------------------------------------------------------------------------------------------------------|--------------------|---------------|-----------------------------|---------------------|---------------------|------|------|
| 12097290  | 2002 | Evaluation of candidate genes MAP2K4, MADH4, ACVR1B, and BRCA2 in familial pancreatic cancer: deleterious BRCA2 mutations in 17%.                     | Murphy KM          | United States | White, United States        | <i>BRCA2</i>        | 7                   | 1    | 1    |
| 12454511  | 2002 | CDKN2A germline mutations in familial pancreatic cancer.                                                                                              | Bartsch DK         | Germany       | German, Germany             | <i>CDKN2A</i>       | 4                   | 1    | 1    |
| 12569143  | 2003 | BRCA2 germline mutations in familial pancreatic carcinoma.                                                                                            | Hahn SA            | Germany       | German and British, Germany | <i>BRCA2</i>        | 6                   | 3    | 2    |
| 12649567  | 2003 | N34S, a pancreatitis associated SPINK1 mutation, is not associated with sporadic pancreatic cancer.                                                   | Teich N            | Germany       | German, Germany             | <i>SPINK1</i>       | 1                   | 0    | 0    |
| 12750283  | 2003 | Fanconi anemia gene mutations in young-onset pancreatic cancer.                                                                                       | van der Heijden MS | United States | Unknown, United States      | <i>FANCC</i>        | 1                   | 0    | 0    |
| 14688470  | 2003 | Polymorphisms of SPINK1 N34S and CFTR in patients with sporadic and familial pancreatic cancer.                                                       | Matsubayashi H     | United States | Unknown, United States      | <i>CFTR, SPINK1</i> | 2                   | 0    | 1    |
| 14726700  | 2004 | The genetics of FANCC and FANCG in familial pancreatic cancer.                                                                                        | Rogers CD          | United States | Mixed, United States        | <i>FANCC</i>        | 2                   | 0    | 0    |
| 15017610  | 2004 | Clinical and genetic characteristics of hereditary pancreatitis in Europe.                                                                            | Howes N            | United States | Mixed, Europe               | <i>PRSS1</i>        | 3                   | 0    | 1    |
| 15084977  | 2004 | Hereditary pancreatitis as the premalignant disease: a Japanese case of pancreatic cancer involving the SPINK1 gene mutation N34S.                    | Masamune A         | Japan         | Japanese, Japan             | <i>SPINK1</i>       | 1                   | 0    | 0    |
| 15146471  | 2004 | Familial melanoma, pancreatic cancer and germline CDKN2A mutations.                                                                                   | Goldstein AM       | United States | Mixed                       | <i>CDKN2A</i>       | 18                  | 5    | 4    |
| 15173226  | 2004 | Prospective risk of cancer in CDKN2A germline mutation carriers.                                                                                      | Goldstein AM       | United States | White, United States        | <i>CDKN2A</i>       | 2                   | 1    | 1    |
| 15591268  | 2004 | Genetics of the FANCA gene in familial pancreatic cancer.                                                                                             | Rogers CD          | United States | Mixed, United States        | <i>FANCA</i>        | 12                  | 0    | 0    |
| 15695377  | 2005 | Germline Fanconi anemia complementation group C mutations and pancreatic cancer.                                                                      | Couch FJ           | United States | Mixed, United States        | <i>FANCC</i>        | 11                  | 0    | 0    |
| 15764155  | 2005 | Mutations N34S and P55S of the SPINK1 gene in patients with chronic pancreatitis or pancreatic cancer and in healthy subjects: a report from Finland. | Lempinen M         | Finland       | Finnish, Finland            | <i>SPINK1</i>       | 1                   | 0    | 0    |
| 15806175  | 2005 | Increased prevalence of the BRCA2 polymorphic stop codon K3326X among individuals with familial pancreatic cancer.                                    | Martin ST          | United States | Unselected, United States   | <i>BRCA2</i>        | 1                   | 0    | 1    |
| 16227367  | 2005 | Cystic fibrosis transmembrane regulator gene carrier status is a risk factor for young onset pancreatic adenocarcinoma.                               | McWilliams R       | United States | Unknown, United States      | <i>CFTR</i>         | 3                   | 0    | 2    |
| 16858628  | 2006 | Low frequency of CHEK2 mutations in familial pancreatic cancer.                                                                                       | Bartsch DK         | Germany       | White, Germany              | <i>CHEK2</i>        | 1                   | 1    | 0    |
| 16905682  | 2007 | Features associated with germline CDKN2A mutations: a GenoMEL study of melanoma-prone families from three continents.                                 | Goldstein AM       | United States | Mixed                       | <i>CDKN2A</i>       | 6                   | 4    | 1    |
| 16996571  | 2006 | Medullary carcinoma of the pancreas in a man with hereditary nonpolyposis colorectal cancer due to a mutation of the MSH2 mismatch repair gene.       | Banville N         | Ireland       | Unknown, Ireland            | <i>MSH2</i>         | 1                   | 0    | 0    |
| 17072959  | 2006 | Lack of association between UGT1A7, UGT1A9, ARP, SPINK1 and CFTR gene polymorphisms and pancreatic cancer in Italian patients.                        | Piepoli A          | Italian       | Italian, Italy              | <i>CFTR, SPINK1</i> | 3                   | 0    | 1    |
| 17194196  | 2006 | Palladin mutation causes familial pancreatic cancer and suggests a new cancer mechanism.                                                              | Pogue-Geile KL     | United States | White, United States        | <i>PALLD</i>        | 1                   | 0    | 1    |
| 17238043  | 2007 | Differential roles of the SPINK1 gene mutations in alcoholic and nonalcoholic chronic pancreatitis.                                                   | Masamune A         | Japan         | Japanese, Japan             | <i>SPINK1</i>       | 1                   | 0    | 0    |

(Continued on next page)

**SUPPLEMENTARY TABLE 1.** (Continued)

| <b>PubMed ID</b> | <b>Year</b> | <b>Title</b>                                                                                                                                                                | <b>First Author</b>     | <b>Country</b> | <b>Population, Region</b>             | <b>Genes</b>        | <b>Included Variant(s)</b> | <b>Bin1</b> | <b>Bin2</b> |
|------------------|-------------|-----------------------------------------------------------------------------------------------------------------------------------------------------------------------------|-------------------------|----------------|---------------------------------------|---------------------|----------------------------|-------------|-------------|
| 17415588         | 2007        | The P239S palladin variant does not account for a significant fraction of hereditary or early onset pancreas cancer.                                                        | Zogopoulos G            | Canada         | Unknown, Canada                       | <i>PALLD</i>        | 2                          | 0           | 1           |
| 18184119         | 2008        | Risk of pancreatic adenocarcinoma in patients with hereditary pancreatitis: a national exhaustive series.                                                                   | Rebours V               | France         | French, France                        | <i>PRSS1</i>        | 2                          | 0           | 1           |
| 18437078         | 2008        | BRCA2 mutations as a universal risk factor for pancreatic cancer has a limited role in Korean ethnic group.                                                                 | Cho JH                  | Korea          | Korean, Korea                         | <i>BRCA2</i>        | 3                          | 0           | 0           |
| 18439109         | 2008        | Predominant Ashkenazi BRCA1/2 mutations in families with pancreatic cancer.                                                                                                 | Dagan E                 | Israel         | Ashkenazi Jewish, Israel              | <i>BRCA1, BRCA2</i> | 2                          | 2           | 0           |
| 18714178         | 2008        | Low prevalence of CDKN2A/ARF mutations among early-onset cancers of breast, pancreas and malignant melanoma in Poland                                                       | Debniak T               | Poland         | Unknown, Poland                       | <i>CDKN2A</i>       | 2                          | 0           | 0           |
| 18762988         | 2008        | Germline BRCA1 mutations predispose to pancreatic adenocarcinoma                                                                                                            | Al-Sukhni W             | Canada         | Mixed, Canada                         | <i>BRCA1</i>        | 3                          | 2           | 1           |
| 19064968         | 2009        | BRCA germline mutations in Jewish patients with pancreatic adenocarcinoma.                                                                                                  | Ferrone CR              | United States  | Ashkenazi Jews, United States         | <i>BRCA1, BRCA2</i> | 3                          | 3           | 0           |
| 19147782         | 2009        | DNA repair gene polymorphisms and risk of pancreatic cancer.                                                                                                                | Li D                    | United States  | Mixed, United States                  | <i>ATM</i>          | 1                          | 0           | 0           |
| 19264984         | 2009        | Exomic sequencing identifies PALB2 as a pancreatic cancer susceptibility gene.                                                                                              | Jones S                 | United States  | Mixed, United States                  | <i>PALB2</i>        | 4                          | 1           | 0           |
| 19454815         | 2009        | Hereditary pancreatitis: clinical features and inheritance characteristics of the R122C mutation in the cationic trypsinogen gene ( <i>PRSS1</i> ) in six Spanish families. | de las Heras-Castaño G  | Spain          | Spanish, Spain                        | <i>PRSS1</i>        | 1                          | 0           | 0           |
| 19635604         | 2009        | Analysis of the gene coding for the BRCA2-interacting protein PALB2 in familial and sporadic pancreatic cancer.                                                             | Tischkowitz MD          | Canada         | Unknown, Canada                       | <i>PALB2</i>        | 14                         | 0           | 0           |
| 19728162         | 2009        | Germline MLH1 and MSH2 mutations in Italian pancreatic cancer patients with suspected Lynch syndrome.                                                                       | Gargiulo S              | Italy          | Italian, Italy                        | <i>MLH1, MSH2</i>   | 5                          | 0           | 0           |
| 19885835         | 2010        | Cystic fibrosis transmembrane conductance regulator ( <i>CFTR</i> ) gene mutations and risk for pancreatic adenocarcinoma.                                                  | McWilliams RR           | United States  | Mixed, United States                  | <i>CFTR</i>         | 8                          | 0           | 3           |
| 19896093         | 2009        | Chronic pancreatitis and pancreatic cancer: prediction and mechanism.                                                                                                       | Shimosegawa T           | Japan          | Japanese, Japan                       | <i>SPINK1</i>       | 2                          | 1           | 0           |
| 19951905         | 2010        | The variable phenotype of the p.A16V mutation of cationic trypsinogen ( <i>PRSS1</i> ) in pancreatitis families.                                                            | Grocock CJ              | UK             | White, United Kingdom & United States | <i>PRSS1</i>        | 1                          | 0           | 0           |
| 20041885         | 2010        | Clinical and genetic analysis of 18 pancreatic carcinoma/melanoma-prone families.                                                                                           | Bartsch DK              | Germany        | German, Germany                       | <i>BRCA2</i>        | 2                          | 0           | 0           |
| 20110284         | 2010        | Genotype and haplotype analysis of TP53 gene and the risk of pancreatic cancer: an association study in the Czech Republic.                                                 | Naccarati A             | Czech Republic | White, Czech                          | <i>TP53</i>         | 1                          | 0           | 0           |
| 20195775         | 2010        | Prevalence of BRCA2 and CDKN2a mutations in German familial pancreatic cancer families.                                                                                     | Slater EP               | Germany        | White, Germany                        | <i>BRCA2</i>        | 18                         | 2           | 1           |
| 20412113         | 2010        | PALB2 mutations in European familial pancreatic cancer families.                                                                                                            | Slater EP               | Germany        | Mixed, Europe                         | <i>PALB2</i>        | 3                          | 1           | 1           |
| 20643596         | 2010        | CHEK2 gene alterations in the forkhead-associated domain, 1100delC and del5395 do not modify the risk of sporadic pancreatic cancer.                                        | Mohelnikova-Duchonova B | Czech Republic | White, Czech Republic                 | <i>CHEK2</i>        | 2                          | 0           | 2           |
| 20711688         | 2011        | A 67-year-old woman with BRCA 1 mutation associated with pancreatic adenocarcinoma.                                                                                         | Lowery M                | United States  | Ashkenazi Jewish, United States       | <i>BRCA1</i>        | 1                          | 1           | 0           |
| 21150883         | 2011        | Prevalence of CDKN2A mutations in pancreatic cancer patients: implications for genetic counseling.                                                                          | McWilliams RR           | United States  | White, United States                  | <i>CDKN2A</i>       | 8                          | 2           | 3           |

(Continued on next page)

**SUPPLEMENTARY TABLE 1.** (Continued)

| <b>PubMed ID</b> | <b>Year</b> | <b>Title</b>                                                                                                                                                                          | <b>First Author</b> | <b>Country</b> | <b>Population, Region</b>        | <b>Genes</b>                                     | <b>Included Variant(s)</b> | <b>Bin1</b> | <b>Bin2</b> |
|------------------|-------------|---------------------------------------------------------------------------------------------------------------------------------------------------------------------------------------|---------------------|----------------|----------------------------------|--------------------------------------------------|----------------------------|-------------|-------------|
| 21184274         | 2011        | PALB2 germline mutations in familial breast cancer cases with personal and family history of pancreatic cancer.                                                                       | Peterlongo P        | Italy          | Italian, Italy                   | <i>PALB2</i>                                     | 1                          | 0           | 0           |
| 21468597         | 2011        | TP53 codon 72 polymorphism is associated with pancreatic cancer risk in males, smokers and drinkers.                                                                                  | Sonoyama T          | Japan          | Japanese, Japan                  | <i>TP53</i>                                      | 1                          | 0           | 0           |
| 21598239         | 2012        | Prevalence of BRCA1 and BRCA2 mutations in Ashkenazi Jewish families with breast and pancreatic cancer.                                                                               | Stadler ZK          | United States  | Ashkenazi Jewish, United States  | <i>BRCA1, BRCA2</i>                              | 4                          | 3           | 1           |
| 21926548         | 2011        | Pancreatic cancer and a novel MSH2 germline alteration.                                                                                                                               | Lindor NM           | United States  | Northern European, United States | <i>MSH2</i>                                      | 1                          | 0           | 1           |
| 21989927         | 2012        | Contribution of germline mutations in the BRCA and PALB2 genes to pancreatic cancer in Italy.                                                                                         | Ghiorzo P           | Italy          | Italian, Italy                   | <i>BRCA1, BRCA2</i>                              | 7                          | 0           | 1           |
| 22368299         | 2012        | CDKN2A is the main susceptibility gene in Italian pancreatic cancer families.                                                                                                         | Ghiorzo P           | Italy          | Italian, Italy                   | <i>CDKN2A</i>                                    | 6                          | 1           | 1           |
| 22585167         | 2012        | ATM mutations in patients with hereditary pancreatic cancer.                                                                                                                          | Roberts NJ          | United States  | Unknown, United States           | <i>ATM</i>                                       | 6                          | 1           | 3           |
| 23415580         | 2013        | Cancer risk associated with STK11/LKB1 germline mutations in Peutz-Jeghers syndrome patients: results of an Italian multicenter study.                                                | Resta N             | Italy          | Italian, Italy                   | <i>STK11</i>                                     | 1                          | 0           | 0           |
| 23561644         | 2013        | Exome sequencing identifies nonsegregating nonsense ATM and PALB2 variants in familial pancreatic cancer.                                                                             | Grant RC            | Canada         | Unknown, Canada                  | <i>ATM, PALB2</i>                                | 2                          | 0           | 0           |
| 23658460         | 2013        | High Prevalence of BRCA1 and BRCA2 Germline Mutations with Loss of Heterozygosity in a Series of Resected Pancreatic Adenocarcinoma and Other Neoplastic Lesions                      | Lucas AL            | United States  | Ashkenazi Jewish, United States  | <i>BRCA1, BRCA2</i>                              | 3                          | 3           | 0           |
| 23751316         | 2013        | Clinical and morphological characteristics of sporadic genetically determined pancreatitis as compared to idiopathic pancreatitis: higher risk of pancreatic cancer in CFTR variants. | Hamoir C            | Belgium        | Unknown, Belgium                 | <i>CFTR</i>                                      | 3                          | 0           | 0           |
| 23935836         | 2013        | Analysis of PALB2 gene in BRCA1/BRCA2 negative Spanish hereditary breast/ovarian cancer families with pancreatic cancer cases.                                                        | Blanco A            | Spain          | Spanish, Spain                   | <i>PALB2</i>                                     | 19                         | 0           | 0           |
| 24737347         | 2014        | BRCA1 and BRCA2 germline mutations are frequently demonstrated in both high-risk pancreatic cancer screening and pancreatic cancer cohorts.                                           | Lucas AL            | United States  | Mixed, United States             | <i>BRCA1, BRCA2</i>                              | 4                          | 2           | 1           |
| 24802709         | 2014        | A founder MLH1 mutation in Lynch syndrome families from Piedmont, Italy, is associated with an increased risk of pancreatic tumours and diverse immunohistochemical patterns.         | Borelli I           | Italy          | Italian, Italy                   | <i>MLH1</i>                                      | 1                          | 0           | 1           |
| 25003218         | 2014        | CFTR, SPINK1, PRSS1, and CTSC Mutations Are Not Associated With Pancreatic Cancer in German Patients                                                                                  | Schubert S          | Germany        | Mixed, Germany                   | <i>CFTR, SPINK1</i>                              | 2                          | 1           | 1           |
| 25072261         | 2014        | Overall survival and clinical characteristics of pancreatic cancer in BRCA mutation carriers.                                                                                         | Golan T             | Israel         | Mixed, Israel                    | <i>BRCA1, BRCA2</i>                              | 20                         | 3           | 8           |
| 25227142         | 2015        | Prospective risk of cancer and the influence of tobacco use in carriers of the p16-Leiden germline variant.                                                                           | Potjer TP           | Netherlands    | Unknown, Netherlands             | <i>CDKN2A</i>                                    | 1                          | 1           | 0           |
| 25356972         | 2015        | BRCA1, BRCA2, PALB2, and CDKN2A mutations in familial pancreatic cancer: a PACGENE study.                                                                                             | Zhen DB             | United States  | Mixed, United States             | <i>BRCA1, BRCA2, CDKN2A, PALB2</i>               | 67                         | 8           | 10          |
| 25479140         | 2015        | Prevalence of germline mutations in cancer predisposition genes in patients with pancreatic cancer.                                                                                   | Grant RC            | Canada         | Unknown, Canada                  | <i>ATM, BRCA1, BRCA2, MLH1, MSH2, MSH6, TP53</i> | 11                         | 0           | 4           |
| 25675422         | 2015        | Pancreatic mass in a young CFTR carrier with a heterozygous p.R117H CFTR gene mutation and homozygous 7T.                                                                             | Hanna T             | United Kingdom | Unknown, United Kingdom          | <i>CFTR</i>                                      | 1                          | 0           | 1           |

(Continued on next page)

**SUPPLEMENTARY TABLE 1.** (Continued)

| PubMed ID | Year | Title                                                                                                                                                                           | First Author | Country        | Population, Region            | Genes                                                                                    | Included Variant(s) | Bin1 | Bin2 |
|-----------|------|---------------------------------------------------------------------------------------------------------------------------------------------------------------------------------|--------------|----------------|-------------------------------|------------------------------------------------------------------------------------------|---------------------|------|------|
| 25734904  | 2015 | Impact of TP53 codon 72 and MDM2 SNP 309 polymorphisms in pancreatic ductal adenocarcinoma.                                                                                     | Hori Y       | Japan          | Japanese, Japan               | <i>TP53</i>                                                                              | 1                   | 0    | 0    |
| 25940717  | 2015 | Germline BRCA Mutations in a Large Clinic-Based Cohort of Patients With Pancreatic Adenocarcinoma.                                                                              | Holter S     | Canada         | Mixed, Canada                 | <i>BRCA1, BRCA2</i>                                                                      | 12                  | 0    | 4    |
| 26041759  | 2015 | The BRCA2 polymorphic stop codon: stuff or nonsense?                                                                                                                            | Higgs JE     | United Kingdom | Mixed, Europe                 | <i>BRCA2</i>                                                                             | 1                   | 0    | 1    |
| 26421687  | 2016 | The APC I1307K allele conveys a significant increased risk for cancer.                                                                                                          | Leshno A     | Israel         | Unknown, Israel               | <i>APC</i>                                                                               | 1                   | 0    | 1    |
| 26483394  | 2016 | Prevalence of Pathogenic Mutations in Cancer Predisposition Genes among Pancreatic Cancer Patients.                                                                             | Hu C         | United States  | Mixed, United States          | <i>ATM, BRCA1, BRCA2, CDKN2A, CHEK2, MLH1, MSH2, MSH6, PMS2, TP53, FANCM, BARD1, NBN</i> | 27                  | 2    | 3    |
| 26658419  | 2016 | Whole Genome Sequencing Defines the Genetic Heterogeneity of Familial Pancreatic Cancer.                                                                                        | Roberts NJ   | United States  | Mixed, United States          | <i>ATM, BRCA1, CDKN2A, PALB2</i>                                                         | 7                   | 4    | 1    |
| 27038244  | 2016 | Do founder mutations characteristic of some cancer sites also predispose to pancreatic cancer?                                                                                  | Lener MR     | Poland         | Polish, Poland                | <i>BRCA1, CHEK2, PALB2</i>                                                               | 6                   | 2    | 2    |
| 27106063  | 2016 | Mutation analysis of the PALB2 gene in unselected pancreatic cancer patients in the Czech Republic                                                                              | Borecka M    | Czech Republic | White, Czech                  | <i>PALB2</i>                                                                             | 16                  | 1    | 0    |
| 27114589  | 2016 | Benefit of Surveillance for Pancreatic Cancer in High-Risk Individuals: Outcome of Long-Term Prospective Follow-Up Studies From Three European Expert Centers.                  | Vasen H      | Netherlands    | Mixed, the Netherlands        | <i>CDKN2A</i>                                                                            | 1                   | 1    | 0    |
| 27150568  | 2016 | The c.657del5 variant in the NBN gene predisposes to pancreatic cancer.                                                                                                         | Borecka M    | Czech Republic | White, Czech                  | <i>NBN</i>                                                                               | 1                   | 0    | 1    |
| 27358244  | 2016 | Metastatic pancreatic adenocarcinoma associated with chronic calcific pancreatitis and a heterozygous SPINK1 N34S mutation.                                                     | Moran RA     | United States  | Unknown, United States        | <i>SPINK1</i>                                                                            | 1                   | 0    | 0    |
| 27449771  | 2016 | Multiple rare variants in high-risk pancreatic cancer-related genes may increase risk for pancreatic cancer in a subset of patients with and without germline CDKN2A mutations. | Yang XR      | United States  | Mixed, United States & Europe | <i>APC, ATM, BRCA1, BRCA2, CFTR, FANCA, MLH1, MSH2, MSH6, PALB2, PALLD, PMS2, TP53</i>   | 32                  | 1    | 2    |
| 27488870  | 2016 | The Prevalence of Founder Mutations Among Individuals from Families with Familial Pancreatic Cancer Syndrome.                                                                   | Lener MR     | Poland         | Polish, Poland                | <i>BRCA1, CHEK2, PALB2</i>                                                               | 7                   | 4    | 2    |
| 27732944  | 2016 | Germline mutations in Japanese familial pancreatic cancer patients.                                                                                                             | Takai E      | Japan          | Unknown, Japan                | <i>BRCA2, PALB2, ATM, MLH1</i>                                                           | 10                  | 0    | 1    |
| 27803004  | 2017 | Mismatch-repair-deficient metastatic pancreatic ductal adenocarcinoma with a germline PALB2 mutation: unusual genetics, unusual clinical course.                                | Boeck S      | Germany        | Unknown, Germany              | <i>PALB2, BRCA2, ATM</i>                                                                 | 3                   | 0    | 0    |
| 27838800  | 2017 | Double germline mutations in APC and BRCA2 in an individual with a pancreatic tumor.                                                                                            | Goehringer C | Germany        | Unknown, Germany              | <i>APC, BRCA2</i>                                                                        | 2                   | 0    | 0    |
