# Supplementary material
Source: PubMed Central journal article supplement (PMC6097243)
Supplement: NIHMS979431-supplement-Supplemental_Data_File__doc__pdf__etc___2.pdf [file NIHMS979431-supplement-Supplemental_Data_File__doc__pdf__etc___2.pdf]

**Germline Variants and Risk for Pancreatic Cancer**  
**A Systematic Review and Emerging Concepts**

**SUPPLEMENTAL DIGITAL CONTENT**

**SUPPLEMENTARY TABLE 2.** Likely Pathogenic Variants

| Gene         | cDNA Nucleotide Change | Hg19 Position           | Transcript  | Amino Acid Change | dbSNP rs. id | ClinVar                                                  | PubMed ID                    | Population, Region*                                                 | MAF (ExAC)  | CADD Score | Family History* | Co-segregation† |
|--------------|------------------------|-------------------------|-------------|-------------------|--------------|----------------------------------------------------------|------------------------------|---------------------------------------------------------------------|-------------|------------|-----------------|-----------------|
| <i>APC</i>   | c.3920T>A              | chr5:112175211          | NM_000038.4 | p.Ile1307Lys      | rs1801155    | Conflicting (pathogenic [2]; uncertain significance [2]) | 26421687; 9973276            | Unknown, Israel; Ashkenazi Jewish, Canada                           | A:1.688e-03 | 5.302      | False           | False           |
| <i>ATM</i>   | c.170G>A               | chr11:108098600         | NM_000051.3 | p.Trp57Ter        | rs587779818  | Pathogenic                                               | 22585167                     | Unknown, United States                                              | —           | 37         | True            | True            |
| <i>ATM</i>   | c.1978delA             | chr11:108124620         | NM_000051.3 | p.Met660Trpfs     | .            | .                                                        | 26658419                     | Mixed, United States                                                | T:6.590e-05 | 33         | True            | True            |
| <i>ATM</i>   | c.3801delG             | chr11:108155008         | NM_000051.3 | p.Val1268Terfs    | rs587779834  | Pathogenic                                               | 22585167; 25479140           | Unknown, United States; Unknown, Canada                             | .           | 35         | True            | False           |
| <i>ATM</i>   | c.6095G>A              | chr11:108186638         | NM_000051.3 | p.Arg2032Lys      | rs139770721  | Pathogenic/<br>likely pathogenic                         | 22585167                     | Unknown, United States                                              | A:4.118e-05 | 26.2       | True            | False           |
| <i>ATM</i>   | c.7327C>T              | chr11:108200960         | NM_000051.3 | p.Arg2443Ter      | rs121434220  | Pathogenic/<br>likely pathogenic                         | 26483394                     | Mixed, United States                                                | —           | 43         | True            | False           |
| <i>BRCA1</i> | c.5266insC             | chr17:41209079-41209080 | NM_007294.3 | p.Gln1756Profs    | rs397507247  | Pathogenic                                               | 25356972                     | Mixed, United States                                                | G:1.565e-04 | 35         | True            | False           |
| <i>BRCA1</i> | c.2199delG             | chr17:41245349          | NM_007294.3 | p.Lys734Asnfs     | rs80357944   | Pathogenic                                               | 18762988; 25072261           | Mixed, Canada; Mixed, Israel                                        | —           | 23.6       | True            | False           |
| <i>BRCA2</i> | c.262_263delCT         | chr13:32893408-32893409 | NM_000059.3 | p.Leu88Alafs      | rs276174825  | Pathogenic                                               | 25940717; 25072261           | Mixed, Canada; Mixed, Israel                                        | —           | 21.8       | False           | False           |
| <i>BRCA2</i> | c.771_775delTCAAA      | chr13:32905145-32905149 | NM_000059.3 | p.Asn257Lysfs     | rs80359675   | Pathogenic                                               | 9150155; 8673089             | Icelanders, Iceland; Icelanders, Iceland                            | —           | 25.4       | True            | False           |
| <i>BRCA2</i> | c.1736T>G              | chr13:32907351          | NM_000059.3 | p.Leu579Ter       | rs1131692274 | Pathogenic                                               | 25940717; 25072261           | Mixed, Canada; Mixed, Israel                                        | —           | 36         | False           | False           |
| <i>BRCA2</i> | c.1813dupA             | chr13:32907428-32907429 | NM_000059.3 | p.Ile605Asnfs     | rs80359308   | Pathogenic                                               | 25356972; 25072261           | Mixed, United States; Mixed, Israel                                 | —           | 23.3       | True            | False           |
| <i>BRCA2</i> | c.2806_2809delAAAC     | chr13:32911298-32911301 | NM_000059.3 | p.Ala938Profs     | rs80359351   | Pathogenic                                               | 25479140                     | Unknown, Canada                                                     | —           | 27.7       | True            | False           |
| <i>BRCA2</i> | c.2808_2811delACAA     | chr13:32911300-32911303 | NM_000059.3 | p.Ala938Profs     | rs80359352   | Pathogenic                                               | 21598239                     | Ashkenazi Jewish, United States                                     | —           | 27.7       | True            | False           |
| <i>BRCA2</i> | c.2957_2958insG        | chr13:32911449-32911450 | NM_000059.3 | p.Asn986Lysfs     | rs80359365   | Pathogenic                                               | 25940717; 25072261           | Mixed, Canada; Mixed, Israel                                        | —           | 22.9       | False           | False           |
| <i>BRCA2</i> | c.3847_3848delGT       | chr13:32912339-32912340 | NM_000059.3 | p.Val1283Lysfs    | rs80359405   | Pathogenic                                               | 12569143; 25356972; 25072261 | German and British, Germany; Mixed, United States; Mixed, Israel    | —           | 23.9       | True            | False           |
| <i>BRCA2</i> | c.5722_5723delCT       | chr13:32914214-32914215 | NM_000059.3 | p.Leu1908Argfs    | rs80359531   | Pathogenic                                               | 25356972; 25940717; 25072261 | Mixed, United States; Mixed, Canada; Mixed, Israel                  | —           | 23.7       | True            | False           |
| <i>BRCA2</i> | c.5796_5797delTA       | chr13:32914288-32914289 | NM_000059.3 | p.His1932Glnfs    | rs80359537   | Pathogenic                                               | 24737347; 21989927; 27449771 | Mixed, United States; Italian, Italy; Mixed, United States & Europe | —           | 25.8       | True            | False           |
| <i>BRCA2</i> | c.6373dupA             | chr13:32914865          | NM_000059.3 | p.Thr2125Asnfs    | rs80359577   | Pathogenic                                               | 26483394; 25356972           | Mixed, United States; Mixed, United States                          | —           | 24.1       | True            | False           |
| <i>BRCA2</i> | c.6444dupT             | chr13:32914936-32914937 | NM_000059.3 | p.Ile2149Tyrfs    | rs80359590   | Pathogenic                                               | 12569143; 20195775           | German and British, Germany; White, Germany                         | —           | 24.7       | True            | False           |
| <i>BRCA2</i> | c.8537_8538delAG       | chr13:32945142-32945143 | NM_000059.3 | p.Glu2846Glyfs    | rs80359716   | Pathogenic                                               | 25356972; 25072261           | Mixed, United States; Mixed, Israel                                 | —           | 35         | True            | False           |

(Continued on next page)

**SUPPLEMENTARY TABLE 2.** (Continued)

| Gene          | cDNA Nucleotide Change | Hg19 Position            | Transcript  | Amino Acid Change | dbSNP rs. id | ClinVar                                                                                      | PubMed ID                                                                                | Population, Region*                                                                                                                        | MAF (ExAC)               | CADD Score | Family History* | Co-segregation† |
|---------------|------------------------|--------------------------|-------------|-------------------|--------------|----------------------------------------------------------------------------------------------|------------------------------------------------------------------------------------------|--------------------------------------------------------------------------------------------------------------------------------------------|--------------------------|------------|-----------------|-----------------|
| <i>BRCA2</i>  | c.9076C>T              | chr13:32954009           | NM_000059.3 | p.Gln3026Ter      | rs80359159   | Pathogenic                                                                                   | 27732944                                                                                 | Unknown, Japan                                                                                                                             | G:1.648e-05              | 52         | True            | False           |
| <i>BRCA2</i>  | c.9976A>T              | chr13:32972626           | NM_000059.3 | p.Lys3326Ter      | rs11571833   | Benign                                                                                       | 12097290; 15806175;<br>26041759                                                          | White, United States; Unselected, US;<br>Mixed, Europe                                                                                     | T:7.010e-03              | 38         | True            | False           |
| <i>CDKN2A</i> | c.301G>A               | chr9:21971057            | NM_000077.4 | p.Gly101Arg       | rs104894094  | Uncertain significance                                                                       | 25356972                                                                                 | Mixed, United States                                                                                                                       | G:1.671e-05              | 34         | True            | False           |
| <i>CDKN2A</i> | c.284_285insG          | chr9:21971074-21971075   | NM_000077.4 | p.Val95Glyfs      | .            | .                                                                                            | 12454511                                                                                 | German, Germany                                                                                                                            | —                        | 24.7       | True            | True            |
| <i>CDKN2A</i> | c.260G>C               | chr9:21971098            | NM_000077.4 | p.Arg87Pro        | rs878853647  | Pathogenic                                                                                   | 15173226; 15146471                                                                       | White, United States; Mixed                                                                                                                | —                        | 35         | True            | False           |
| <i>CDKN2A</i> | c.240_253del14         | chr9:21971105-21971118   | NM_000077.4 | p.Pro81Cysfs      | rs730881675  | Pathogenic                                                                                   | 15146471                                                                                 | Mixed                                                                                                                                      | —                        | 35         | True            | False           |
| <i>CDKN2A</i> | c.238_251del14         | chr9:21971107-21971120   | NM_000077.4 | p.Arg80fs         | —            | —                                                                                            | 21150883                                                                                 | White, United States                                                                                                                       | —                        | 35         | False           | False           |
| <i>CDKN2A</i> | c.199G>C               | chr9:21971159            | NM_000077.4 | p.Gly67Arg        | rs758389471  | Uncertain significance                                                                       | 22368299                                                                                 | Italian, Italy                                                                                                                             | T:8.402e-06              | 32         | True            | False           |
| <i>CDKN2A</i> | c.159G>C               | chr9:21971199            | NM_000077.4 | p.Met53Ile        | rs104894095  | Pathogenic, risk factor                                                                      | 25356972; 10719365                                                                       | Mixed, United States; Unknown, Canada                                                                                                      | G:1.671e-05              | 28.3       | True            | False           |
| <i>CDKN2A</i> | c.146T>G               | chr9:21974681            | NM_000077.4 | p.Ile49Ser        | —            | —                                                                                            | 10667595; 15146471;<br>10719365                                                          | Mixed, Canada; Mixed; Unknown, Canada                                                                                                      | G:4.365e-04              | 28.2       | True            | False           |
| <i>CDKN2A</i> | c.71G>C                | chr9:21974756            | NM_000077.4 | p.Arg24Pro        | rs104894097  | Pathogenic/<br>Likely pathogenic, risk factor                                                | 25356972; 16905682;<br>15146471; 21150883                                                | Mixed, United States; Mixed; Mixed;<br>White, US                                                                                           | —                        | 24.7       | True            | False           |
| <i>CDKN2A</i> | c.47T>G                | chr9:21974780            | NM_000077.4 | p.Leu16Arg        | rs864622263  | Conflicting (likely pathogenic [1]; uncertain significance [1])                              | 25356972; 21150883                                                                       | Mixed, United States; White, United States                                                                                                 | —                        | 23.7       | True            | False           |
| <i>CFTR</i>   | c.350G>A               | chr7:117171029           | NM_000492.3 | p.Arg117His       | rs78655421   | Pathogenic                                                                                   | 25675422; 19885835;<br>16227367                                                          | Unknown, United Kingdom; Mixed, United States; Unknown, US                                                                                 | A:1.524e-03; T:8.237e-06 | 24.9       | False           | False           |
| <i>CFTR</i>   | c.1521_1523delCTT      | chr7:117199646-117199648 | NM_000492.3 | p.Phe508del       | rs113993960  | Pathogenic                                                                                   | 19885835; 7522998;<br>25003218; 11115825;<br>14688470; 17072959;<br>16227367<br>19885835 | Mixed, United States; White, United States; Mixed, Germany; Unknown, Spain; Unknown, United States; Italian, Italy; Unknown, United States | .                        | 21.3       | False           | False           |
| <i>CFTR</i>   | c.1652G>A              | chr7:117227860           | NM_000492.3 | p.Gly551Asp       | rs75527207   | Pathogenic                                                                                   | 19885835                                                                                 | Mixed, United States                                                                                                                       | A:1.400e-04              | 33         | False           | False           |
| <i>CHEK2</i>  | c.470T>C               | chr22:29121087           | NM_007194.3 | p.Ile157Thr       | rs17879961   | Conflicting (likely pathogenic [3]; pathogenic [4]; uncertain significance [1]), risk factor | 27488870; 20643596;<br>27038244                                                          | Polish, Poland; White, Czech Republic; Polish, Poland                                                                                      | —                        | 21.1       | True            | False           |
| <i>CHEK2</i>  | c.319+1G>A             | chr22:29130390           | NM_007194.3 | —                 | rs765080766  | —                                                                                            | 20643596; 27488870;<br>27038244                                                          | White, Czech Republic; Polish, Poland; Polish, Poland                                                                                      | —                        | 26.9       | False           | False           |
| <i>MLH1</i>   | c.2252_2253delAA       | chr3:37092125-37092126   | NM_000249.3 | p.Lys751Serfs     | rs267607907  | Uncertain significance                                                                       | 24802709                                                                                 | Italian, Italy                                                                                                                             | —                        | 35         | True            | True            |
| <i>MSH2</i>   | c.942+3A>T             | chr2:47641560            | NM_000251.2 | —                 | rs193922376  | Pathogenic                                                                                   | 25479140                                                                                 | Unknown, Canada                                                                                                                            | —                        | 14.19      | True            | False           |
| <i>MSH2</i>   | c.1046C>T              | chr2:47643538            | NM_000251.2 | p.Pro349Leu       | rs587779067  | Pathogenic                                                                                   | 21926548                                                                                 | Northern European, United States                                                                                                           | —                        | 33         | True            | True            |

(Continued on next page)

**SUPPLEMENTARY TABLE 2.** (Continued)

| Gene         | cDNA Nucleotide Change | Hg19 Position          | Transcript     | Amino Acid Change | dbSNP rs. id | ClinVar                                                           | PubMed ID          | Population, Region*                          | MAF (ExAC)  | CADD Score | Family History* | Co-segregation† |
|--------------|------------------------|------------------------|----------------|-------------------|--------------|-------------------------------------------------------------------|--------------------|----------------------------------------------|-------------|------------|-----------------|-----------------|
| <i>NBN</i>   | c.657_661delACAAA      | chr8:90983442-90983446 | NM_002485.4    | p.Lys219Asnfs     | rs587776650  | Pathogenic, risk factor                                           | 27150568; 26483394 | Slavian (White), Czech; Mixed, United States | —           | 35         | True            | False           |
| <i>PALB2</i> | c.1240C>T              | chr16:23646627         | NM_024675.3    | p.Arg414Ter       | rs180177100  | Pathogenic                                                        | 20412113; 27449771 | Mixed, Europe; Mixed, United States & Europe | —           | 38         | True            | False           |
| <i>PALLD</i> | c.415C>T               | chr4:169799457         | NM_001166110.1 | p.Pro139Ser       | rs121908291  | Conflicting (benign [1]; uncertain significance [1]), risk factor | 17194196; 17415588 | White, US; Unknown, Canada                   | T:6.069e-05 | 13.12      | True            | True            |
| <i>PRSS1</i> | c.86A>T                | chr7:142458451         | NM_002769.4    | p.Asn29Ile        | rs111033566  | Pathogenic                                                        | 15017610; 18184119 | Mixed, Europe; French, France                | T:0.470     | 18.21      | True            | False           |
| <i>TP53</i>  | c.916C>T               | chr17:7577022          | NM_000546.5    | p.Arg306Ter       | rs121913344  | Pathogenic/<br>likely pathogenic                                  | 25479140           | Unknown, Canada                              | —           | 37         | False           | False           |

\*"Family history" of True indicates if any patient that carries this variant is reported to be found in a pancreatic cancer/pancreatitis family by its study. If this variant is further confirmed to co-segregate with familial disease, "Co-segregation" will be True.

cDNA indicates complementary DNA; hg19, human genome 19; dbSNP rs. Id; The Single Nucleotide Polymorphism database (dbSNP) reference SNP ID number (rs. ID); MAF, minor allele frequency; ExAC, Exome Aggregation Consortium; Combined Annotation Dependent Depletion.
